# Supplementary material for: Non-cognitive symptoms as early indicators of Dementia: A retrospective study from a Psychiatric outpatient clinic
Source: Research Square preprint supplement (doi:10.21203/rs.3.rs-7429906/v1), 2025-10-05
Supplement: Supplementary file 1 [file 6c4c5c45c362e37b848a3842.docx]

supplementary file

Table 1 Diagnosis of study participants in the total sample and by sex

| **Diagnosis ,n(%)** | **Total sample**  **(n=201)** | **Men**  **（n=52）** | **Women**  **(n=149)** | **P-value** |
| --- | --- | --- | --- | --- |
| AD | 138(68.66) | 30(57.69) | 108(72.48) | .097 |
| DLB | 25(12.44) | 6(11.54) | 19(12.75) |  |
| VD | 8(3.99) | 4(7.69) | 4(2.68) |  |
| MD | 17(8.46) | 8(15.38) | 9(6.04) |  |
| FTD | 13(6.47) | 4(7.69) | 9(6.04) |  |

Data are n (%) or mean (SD) unless specified otherwise. *p value for difference between men and women.

Table 2 Prevalence of previous non-cognitive problems and time interval between symptom onset to dementia, by different types of dementia

|  | **All cause dementia** | **AD** | **DLB** | **VD** | **MD** | **FTD** | **P-value** |
| --- | --- | --- | --- | --- | --- | --- | --- |
| Previous problem | 139（69.15） | 83a,b（60.14） | 25c（100） | 6（75） | 12（70.59） | 13（100） | <.001** |
| Affective dysregulation | 80（39.80） | 54（39.13） | 9（36） | 3（37.5） | 8（47.06） | 6（46.15） | .967 |
| Time(months),means(SD) | 70.09（71.09） | 72.39（71.15） | 38.44（28.39） | 25.67（13.05） | 104.88（93.74） | 72.67（86.82） | .344 |
| Sleep problems | 94（46.77） | 53d（38.40） | 21e（84） | 4（50） | 9（52.94） | 7（53.85） | .001* |
| Time(months),means(SD) | 73.23（82.80） | 71.60（72.97） | 74.81（110.99） | 28.25（16.86） | 87.89（87.20） | 87.71（82.64） | .769 |
| Psychiatric disorders | 103(74.10) | 53f,g（38.40） | 24h,i（96） | 4j（50） | 9（52.94） | 13（100） | <.001** |
| Time(months),means(SD) | 41.13(40.95) | 52.25（47.64） | 26.50（19.94） | 26.50（19.42） | 34.33（52.87） | 32.00（22.94） | .107 |

Data are n (%) or mean (SD) unless specified otherwise. *p value for difference between men and women

A: There is significant differences between AD and DLB, p<0.01

B: There is significant differences between AD and FTD, p<0.05

C: There is significant differences between DLB and MD, p<0.05

D: There is significant differences between AD and DLB, p<0.01

E: There is significant differences between DLB and MD, p<0.05

F: There is significant differences between AD and DLB, p<0.01

G: There is significant differences between AD and FTD, p<0.01

H: There is significant differences between DLB and VD, p<0.05

I: There is significant differences between DLB and MD, p<0.05

J: There is significant differences between VD and FTD, p<0.05

Table 3 **Comparisons of clinical characteristics among the cohort**

| **Variables** | **AD（138）** | **Non-AD（63）** | **p-value** |
| --- | --- | --- | --- |
| **Basic demographics** | | | |
| Age | 76.25(8.90) | 75.49(8.80) | .564 |
| Sex |  |  | 0.048* |
| Male | 30 | 22 |  |
| Female | 108 | 41 |  |
| **Clinical symptoms** | | |  |
| Any of neuropsychiatric problems before dementia | | | <0.001*** |
| Positive | 83 | 56 |  |
| Negative | 55 | 7 |  |
| Depressed |  |  | 0.751 |
| Positive | 38 | 16 |  |
| Negative | 100 | 47 |  |
| Anxious |  |  | 0.240 |
| Positive | 29 | 18 |  |
| Negative | 109 | 45 |  |
| Agitated |  |  | 0.475 |
| Positive | 18 | 6 |  |
| Negative | 120 | 57 |  |
| Sleep problems |  |  | <0.001*** |
| Positive | 53 | 41 |  |
| Negative | 84 | 22 |  |
| Difficulty falling asleep | | | <0.001*** |
| Positive | 47 | 39 |  |
| Negative | 91 | 24 |  |
| Easily awakening |  |  | 0.417 |
| Positive | 26 | 15 |  |
| Negative | 112 | 48 |  |
| Early awakening |  |  | 0.835 |
| Positive | 14 | 7 |  |
| Negative | 124 | 56 |  |
| Dreaminess |  |  | 0.192 |
| Positive | 5 | 5 |  |
| Negative | 133 | 58 |  |
| Psychiatric disorders |  |  | <0.001*** |
| Positive | 52 | 48 |  |
| Negative | 86 | 15 |  |
| Hallucination |  |  | <0.001*** |
| Positive | 22 | 31 |  |
| Negative | 116 | 32 |  |
| Delusion |  |  | 0.238 |
| Positive | 27 | 17 |  |
| Negative | 111 | 46 |  |
| Disinhibition |  |  | <0.001*** |
| Positive | 6 | 13 |  |
| Negative | 132 | 50 |  |
| Attack |  |  | 0.319 |
| Positive | 15 | 10 |  |
| Negative | 123 | 53 |  |

Data are n unless specified otherwise. p value for difference between AD and non-AD, * represents for p<0.05, ** represents for p<0.01, *** represents for p<0.001.
